# Supplementary material for: Interacting effects of land-use change, natural hazards and climate change on rice agriculture in Vietnam
Source: Copernicus journal article supplement (doi:10.5194/nhess-2020-196), 2020-07-13
Supplement: Supplementary file [file nhess-2020-196-AC1-supplement.pdf]

19 Nov 2020

**RESPONSE TO REVIEWERS' COMMENTS****TITLE: Interacting effects of land-use change, natural hazards and climate change on rice agriculture in Vietnam**

We thank the reviewers for taking the time to critically evaluate our manuscript and for providing constructive comments to improve our paper. Below, we reproduce all the comments that we have received from the reviewers (blue text) and detail how we will address them in the revised version of our MS (black text). Reference details for the citations used in our responses are provided as a list at the end of this document.

**Reviewer #1:****General comments**

My overall general criticisms are:

1. That more information/data/evidence is needed in support of the factors and processes that might impact rice cultivation on the two deltas investigated. At present there is mention of salt intrusion, erosion, sediment extraction, deltaic subsidence, fluvial sediment capture by dams, contamination, loss of soil quality, sea-level rise and increasing frequency/intensity of hazards. All of these are no doubt important for the long term sustainability of the MRD and RRD. But at the moment various statements by the authors about the relative importance of these processes need better grounding. There needs to be inclusion of published data where available, in order to help firm up the main arguments in the discussion. I fully understand that the overarching aim of the paper is to enable visualisation on how all the various influences are connected. But additional data from the literature are nonetheless still needed for proper substantiation.
2. Many minor grammatical errors need correcting throughout the manuscript.
3. Figures 2 and 3 need rethinking and should be improved.

The case studies in support of the factors and processes that might impact rice cultivation in the two deltas were provided in the supplementary materials. However, we agree with the Reviewer that we should include this information in the manuscript to support our arguments. We will work on including some of the case studies listed in the supplementary materials in the main text. In addition, we will fix the minor grammatical errors throughout the manuscript. Lastly, we agree that Figures 2 and 3 can be improved. We have worked on improving them based on the Reviewer's specific comments.

**Specific comments**

Specific comments and recommendations are listed as below. These are in order as they appear in the manuscript. I trust that the authors will not feel these are unnecessarily critical, but are offered in the spirit of improving the paper for eventual publication.

**ABSTRACT**

L10. The authors use the term 'mega-deltas'. What does mega-delta mean? This term needs to be defined early on somewhere in the body of the paper.

A mega-delta is a large, low-lying sedimentary landform located at the mouths of rivers. The mixing of fresh and saltwater in these sediment-rich land-ocean coastal zones provides fertile land for agricultural activities to support a large number of people. Besides agriculture, resources in mega-deltas have also been tapped for fisheries, navigation, trade, forestry, fossil energy production and manufacturing. Unfortunately, mega-deltas are highly vulnerable to a range of environmental hazards such as typhoons, floods, storm surges, tsunamis, coastal erosion and seasonal inundations. In addition, local human activities, land subsidence, water stresses and global sea level rise have exacerbated its environmental vulnerability (Day et al; 2016; Seto, 2011; Tessler et al. 2015). This information will be added to our manuscript.

L12. Remove 'happening'.

We will remove 'happening'.

L20. Change 'development' to 'growth' to avoid repeating 'development' in the sentence.

Development will be changed to 'growth'.

L21. Use a comma before 'which' or change to 'that'. This error needs correcting throughout the entire manuscript.

Comma will be added before "which".

L24. Hyphenate 'systems thinking' because this is used as an adjectival phrase, i.e. say 'a systems-thinking approach'. Do this similarly throughout the manuscript.

The phrase 'systems thinking' will be hyphenated throughout the manuscript.

## INTRODUCTION

L44. Some references are needed here. The following paper and book chapter might be helpful: 'The 'terrific Tongking typhoon' of October 1881 – implications for the Red River Delta (northern Vietnam) in modern times.' *Weather*, 2012, 67: 72–75. [This gives an example of the severe effect of a typhoon on the rice harvest on the RRD.]

'Impacts of climate change. Challenges of flooding in coastal East Asia.' In: *The Routledge Handbook of Environment and Society in Asia*. P.G. Harris and G. Lang (Eds), Routledge, Oxford, pp.367–383. Chan, F.K.S., et al. 2015. [Mentions problems of flooding on the RRD and MRD, as well as other deltas in Asia.]

Thank you for suggesting these references. We will include them in our text. We will also use Terry et al. (2012) to highlight the dangers posed by a powerful typhoon with strong storm surge and the possibility of such an event happening in future in the Red River Delta.

L56. A reference is needed here in support of this statement.

We will include a reference by Normile (2013).

L59. Remove 'related development' (unnecessary text).

'Related development' will be removed.

L59. Remove 'of'.

'Of' will be removed.

L59-62. How can 'coastal dikes...lead to a reduction in sediment and water availability...'? This misleading sentence needs rewriting.

Sentence will be changed to: 'Infrastructure such as dikes reduces the availability of fertile silt for maintaining soil fertility. In addition, upstream dams, sand mining and ground water extraction have impacts on rice growing areas (Kondolf et al., 2018). Upstream dams and sand mining lead to a reduction in sediment availability and this may cause river channel incision and bank erosion as the sediment-deprived river water tend to erode the channel beds and banks (Kondolf, 1997). Conversely, groundwater extraction exacerbates land subsidence which coupled with rising sea levels may lead to a loss of agricultural land along the coasts (Allison et al., 2017; Robert, 2017; Schmitt et al., 2017).'

L77. Is the mention of 'wicked' problems helpful? What does this even mean? This either needs explaining or omitting.

We use the term 'wicked problems' to refer to problems that have no clear definitions and have no easily identifiable, predefined solutions. They tend to come about due to a complexity and interdependency of components which create feedbacks and nonlinear responses to management interventions. The environmental problems present in the mega-deltas of Vietnam are caused by a range of interdependent anthropogenic and natural hazards drivers and the solutions to these problems are not straightforward. Hence, the use of systems-thinking is appropriate as analysis that considers divergent drivers and environmental effects can avoid oversimplifying a problem (Rittel and Webber, 1973; DeFries and Nagendra, 2017). This information will be added to our manuscript.

## METHODS

L96. If the area of the MRD is 4 million ha, then how can the area of rice planted on the delta be 4.2 million ha? This is not possible, unless the authors are adding together the areas of subsequent plantings during the year. Please explain or correct.

The area of the Mekong Delta in Vietnam is 39,000 km<sup>2</sup>, equivalent to 3,900,000 ha, or 4 million ha (Schneider and Asch, 2020). In 2018, 4,107,200 ha of rice were planted in the Mekong River Delta with 24,506,900 tons of rice produced. The 4.2 million ha was derived from summing up the total planted areas for spring, autumn and winter paddies. The planted area for spring, autumn and winter paddies were 1,573,500 ha, 2,336,500 ha and 197,200 ha respectively (General Statistics Office of Vietnam, 2020). To avoid confusion, we will list the planted areas for each season in our revision.

L101. Is the RRD 'floodplain' area the same as the delta area? Please give the delta area to be consistent with the description of the MRD above.

The size of the Red River Delta in Vietnam is 15,000 km<sup>2</sup>, equivalent to 1.5 million ha (Schneider and Asch, 2020).

L107. Thick 'Quaternary accumulation' of what? Sand, silt or clay? Please briefly give more information on the character of the deltaic sediments.

Soils in the Red River Delta (RRD) consist of thick quaternary accumulation with loose and alternating sediment beds which are mostly organic in nature. In general, the Quaternary is divided into two sequences: the upper part consists of fine sediment clay, sandy clay and fine sand; and the lower part contains gravel with cobbles and coarse sand. The Quaternary sediments are underlain

by a >400 m thick layer of Neogene sedimentary rocks that are made up of conglomerate sandstone, clay and siltstone (Berg et al., 2007). The additional information will be included in our revision.

L109. Remove 'slight'.

'Slight' will be removed

L110. Be more careful with grammar. The text should read '...the MRD has [not have]...while the RRD has [not have] a temperature of...' This type of error crops up many times throughout the manuscript, e.g. L118, L124, L124. Please ask a native English speaker to check the manuscript carefully for corrections.

Grammar will be corrected to 'has.'

L112. Request including climographs for the two deltas, so the reader can more easily understand the annual climatic cycles. Then mark on the graphs the planting, growing and harvesting times of the different rice crops.

We will include a climograph for the two deltas with the rice growing seasons and the different phrases of planting annotated in the revised manuscript.

L118. Please correct grammar.

'Has' will be changed to 'have'

L223. Please correct grammar.

'Was' will be changed to 'were.'

L124. Please correct grammar.

'Was' will be changed to 'were.'

L134. Change '...a major rice producing region' to 'major rice producing regions'.

'A major rice producing region' will be changed to 'major rice producing regions.'

L151. Change 'describe' to 'describes'.

'Describe' will be changed to 'describes.'

## RESULTS

L193. The authors make a sweeping statement but without supporting data. What is the 'extent of saltwater intrusion'? Is it possible to include a map here to show how saltwater intrusion has been extending into the delta over time?

In the Mekong Delta, 2.1 million ha of land is affected by salinity during the dry season (Pham et al., 2018). A map of the incidence and severity of salinity intrusion in the Mekong Delta from Preston et al. (2003) will be referenced (Figure below).

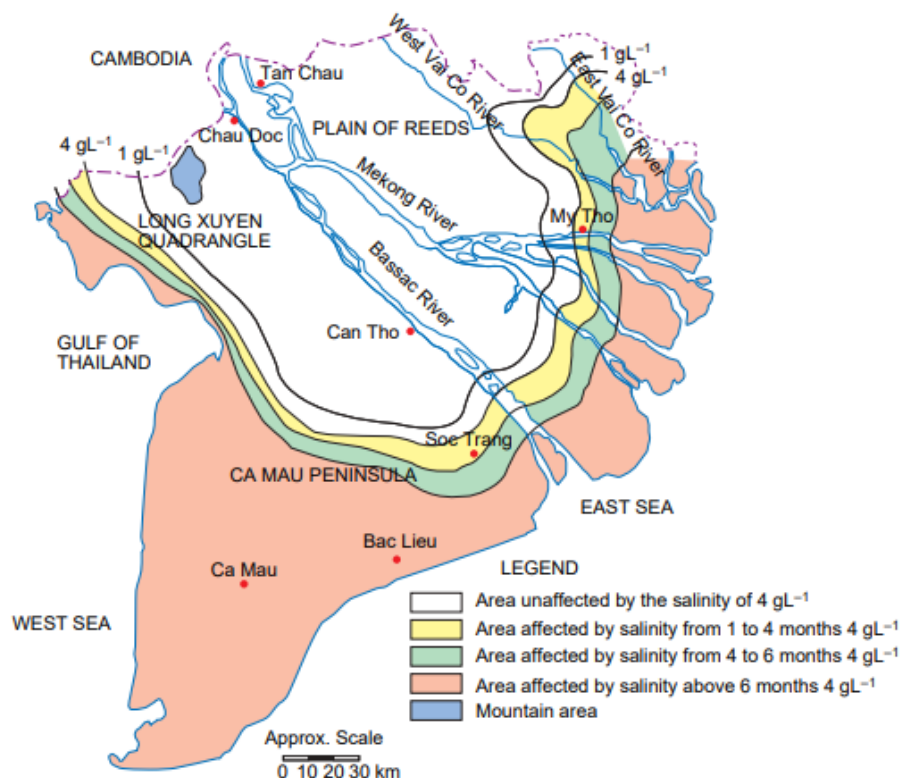

L196. Where does the arsenic contamination come from? Anthropogenic sources? The authors need to explain otherwise the readers are left guessing.

The source of this arsenic contamination is from the groundwater. In the Mekong Delta, naturally occurring biochemical and hydrological processes cause As to be released from Fe oxides in rocks and sediments into groundwater reservoirs (Fendorf et al., 2010). In addition, deep groundwater extraction causes interbedded clays to compact and expel water containing dissolved As or As mobilizing solutes which are transferred into deep aquifer (Erban et al., 2013). Likewise, groundwater in the Red River Delta is also contaminated with high levels of As due to reductive dissolution of As from iron oxyhydroxides in buried sediment (Berg et al., 2007; Luu, 2019).

Even though farmers use river water instead of groundwater to irrigate their rice fields, the use of groundwater for other purposes and their eventual discharge into surrounding soils and rivers mean that soils and river water can become contaminated with As. Crop quality is reduced when the As enriched groundwater is deposited on topsoils and absorbed by plants during growth.

L203. How much sand mining is occurring? Is it for the construction of dikes? Again, some supporting data are needed.

Jordan et al (2019) compiled reported statistics of sand mining activities for the whole of the Vietnamese Mekong Delta and estimated that  $177.77 \text{ Mm}^3$  of sand was extracted in 2018. This value is likely an under-estimate as only reported amounts from local dredging contractors were available. Most of the sand was extracted for the local construction industry while only a small amount was used to maintain the river's channels.

L204. Again, another sweeping statement about the 'substantial reduction in sediment', but without any supporting data. Please substantiate better.

To support this statement about the ‘substantial reduction in sediment’, we refer to Park et al. (2020)’s study on the impact of extensive riverine mining on flood frequency in the Long Xuyen Quadrangle (LXQ) in the Mekong Delta. The LXQ had one of the highest sand extraction rates in Vietnam and there has been a significant decrease in flood frequency over the past 20 years, from 1995-2015. Daily water level series at local gauge stations showed an overall decreasing trend indicating that the lowering of the riverbed has reduced the frequency of flooding. The lack of significant changes in river discharge at a gauging station in Cambodia indicates that the lowering of the riverbed caused by sand mining in the Mekong has affected flood frequency trends more than any other climatic factors.

L204. How much ‘land subsidence’ has occurred, and over what period? Give rates if available. With all of the above, if the authors wish to include saltwater intrusion, sand mining, sediment reduction and land subsidence in their Results section, then some additional supporting data are needed.

Based on time series data from 79 nested monitoring wells at 18 locations in the Mekong River Delta (MRD), Erban et al. (2014) found that compaction rate of sedimentary layers in the MRD is about 16 mm/year, similar to the 10-20 mm/year rates reported by Minderhoud et al. (2018). Likewise, Minderhoud et al. (2017) developed a 3D numerical groundwater flow model of the delta surface and concluded that subsidence rates from groundwater extraction is between 11 and 25 mm/year. The model also showed that 25 years of groundwater extraction since 1991 has resulted in a cumulative average of 18 cm of subsidence with hotspots recording over 30 cm of subsidence. Land subsidence from excessive groundwater extraction acts as a catalyst that increases vulnerability to saltwater intrusion and reduces the availability of land suitable for rice production.

Additional supporting information for saltwater intrusion, sand mining and sediment reduction will be added in the revised manuscript.

L225. This statement is wrong. Thermal expansion of seawater does not accelerate the melting of icecaps! Needs rewriting.

We will remove this sentence.

L234. The authors mention that the coastline is eroding at a rate of 5 to 10 mm/year. This rate seems far too low. A 0.5 cm rate of coastal retreat per year (0.5 m per century) is insignificant and suggests that the RRD and MRD have nothing to worry about. For comparison, Thailand’s Chao Phraya delta front has experienced several km of shoreline retreat over recent decades. Please check the data.

Thank you for spotting this. It should be 5 to 10 m/year and not 5 to 10 mm/year.

L244. Change text to ‘...are affected by...’ (similar use of plural also needed elsewhere).

‘Is affected by’ will be changed to ‘are affected by’

L245. What is the local rate of SLR along the coast of Vietnam or in the wider western South China Sea?

For Vietnam, observations at tide gauges show an average increase of 3.3 mm per year during the period 1993 to 2014 (Hens et al., 2018).

L246. Please give some information on the groundwater salinity thresholds for rice cultivation.

Rice is unable to thrive in the soil and water that have a salinity threshold of more than 4 g/L (Pham et al., 2018).

L258. Please correct grammar. Look out for similar errors elsewhere through the document.

'Shift' will be changed to 'shifts.'

L266. Please rephrase this sentence.

We change the sentence to 'Drought-prone regions may experience longer and more frequent droughts in future.'

L272. This contradicts what was said in L118. In other words, what about the irrigation canals mentioned earlier in the paper? Aren't these used for rice irrigation in the absence of sufficient rainfall?

Sentence will be deleted.

L273. Please correct grammar. Look out for similar errors elsewhere through the document.

"Exacerbates" will be changed to "exacerbate."

L280. What is *Cyrtorhinus*? An insect, snake, bird, mammal? Please give the English name of this predator.

*Cyrtorhinus lividipennis* Reuter (Green Murid Bug) is an insect which predate on common rice pests such as planthoppers and leafhoppers.

## **DISCUSSION**

L301. Please correct grammar.

'Are' will be changed to 'is.'

L302. Please correct grammar.

'Is' will be changed to 'are.'

L307. The authors have not provided any information on typhoon and drought frequencies experienced on the two deltas. Please give supporting information earlier in the paper.

An average of five to six typhoons affects Vietnam between June and November every year (Larson et al., 2014; Nguyen et al., 2007). Typhoon activity shifts from the north to the South as the year progresses. Therefore, peak activity in the north, central and southern part of Vietnam is in August, October and November respectively (Imamura and Dang, 1997). We reviewed the Digital Typhoon Database and found 303 typhoons that came within 500 km of Vietnam's coastline from 1995 to 2018. 29 cyclones made its initial landfall in the Red River Delta while only four cyclones made

landfall in the Mekong Delta during the study period – one each in 1973, 1996, 1997 and 2006. A total of 68 cyclones damaged rice crops during the study period (Unpublished results).

Vietnam was affected by droughts in 1997-1998, 2002-2003, 2009-2010 and most recently in 2015-2016. The 2015-2016 drought was the most severe in 90 years (Grosjean et al., 2016). All thirteen provinces in the Mekong Delta were affected by the 2015 drought. Compared to the Mekong, there is not much research or reports on droughts in the Red River Delta. The UNW-DPC (2014) reported that the Red River Delta experienced droughts from the end of 1998 to April 1999 which affected 86,140 ha of rice. Another drought occurred from January to February 2004 with the water level of the Red River at the lowest in 40 years. Low water levels were also reported in 2010, however drought conditions and saltwater intrusion was more severe in the Mekong (Overland, 2010).

L313. ‘...high arsenic concentrations...likely due to geogenic conditions’. Please elaborate.

High arsenic concentrations in groundwater seem to be of natural origin. In the Mekong Delta, naturally occurring biochemical and hydrological processes cause As to be released from Fe oxides in rocks and sediments into groundwater reservoirs (Fendorf et al., 2010). In addition, deep groundwater extraction causes interbedded clays to compact and expel water containing dissolved As or As mobilizing solutes which are transferred into deep aquifer (Erban et al., 2013). Similarly, groundwater in the Red River Delta is also contaminated with high levels of As due to reductive dissolution of As from iron oxyhydroxides in buried sediment (Berg et al., 2007; Luu, 2019).

L327. Please correct grammar.

“Mean” will be changed to ‘means.’

L338. Please correct grammar.

‘Is’ will be changed to ‘are.’

L353. Please correct grammar.

‘Is’ will be changed to ‘are.’

L356. Change ‘practice’ [noun] to ‘practise’ [verb].

‘Practice’ will be changed to ‘practise.’

L364. Please correct grammar.

‘Helps’ will be changed to ‘help.’

L371. Please correct grammar.

‘Benefits’ will be changed to ‘benefit.’

L386. Please correct grammar.

‘Is’ will be changed to ‘are.’



L386. Please correct grammar (later in the sentence).

'Is' will be changed to 'are.'

## CONCLUSIONS

L391. Use 'Conclusions'.

'Conclusion' will be changed to 'conclusions.'

L411. Please correct grammar.

The sentence will be changed to: 'While the effects of climate change on food productivity are still uncertain...'

L414. Needs rephrasing. Do you mean 'supporting large populations'? [the deltas support large populations – the populations do not support the deltas].

Across the world, deltas are global food production hubs that support large populations.

## REFERENCES

L521. Reference is in the wrong place.

Thank you for noticing this. We will fix it.

## FIGURES

Figure 1. A cardinal sin has been committed with the maps! Never use a word scale. '1 cm = 58 km' will be incorrect if the published version of the map is not exactly the same size as the original. In fact, the scales must be wrong already as the three maps shown cannot all have the same scale. Use a scale bar instead on each map. These will be correct whatever size the maps are viewed or printed.

Noted. A scale bar will be used.

Figure 1. Increase the size of the long/lat text. Too small to read.

Font has been increased.

Figure 1. Label the countries.

Countries have been labelled. The changes to Figure 1 are reflected in the figure below.

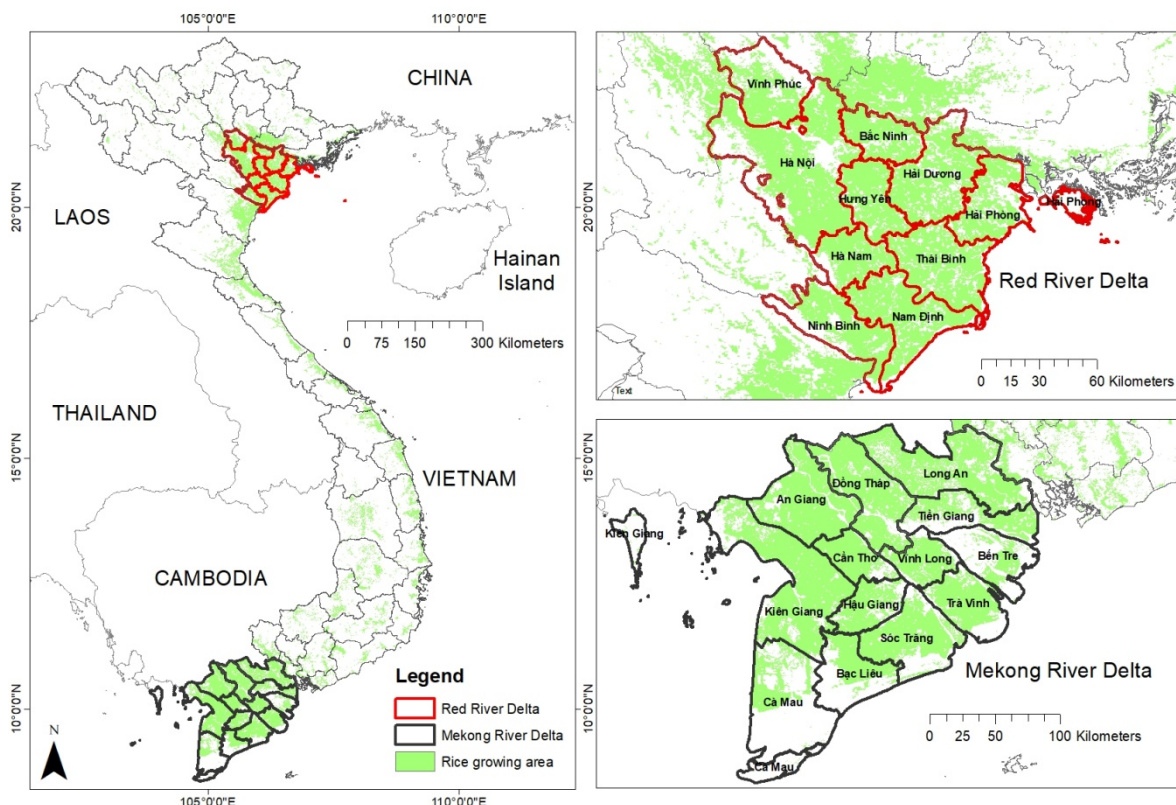

Figure 1. L760-764. Unnecessary repetition. The long list of provinces is not needed, as they are already shown on the map.

Noted. We will remove the list of provinces.

Figure 2. Strictly speaking, it is incorrect to call this a causal loop diagram as claimed, because 'rice yield', 'rice growing area' and 'rice quality' do not loop back to affect the initial two sets of drivers (anthropogenic impacts and natural hazards). Instead, this is an example of a flow diagram, with distinct start and end positions.

We will call this a flow diagram.

Figure 2. I am not convinced that the existing figure will be as useful to policy makers as claimed by the authors in the paper. At present the layout is confusing and rather difficult to digest. I believe it could be improved with some rethinking. I suggest at least the following:  
 Use 'Anthropogenic Drivers' and 'Natural Hazard Drivers' as column headings at the top of the figure. Keep the three important outcomes (rice yield, rice growing area and rice quality) in a separate final row at the bottom of the figure.

Figure 2. Several other points:

Typhoon wind speed affects storm surge. The direct link is missing. Does flooding refer to river (freshwater) flooding or sea (saltwater) flooding? These need to be separated out somehow as they can both have major but different consequences, positive (e.g. fertile silt input, salt flushing) or negative (killing of standing crops, salt contamination of soil). Saltwater flooding needs to be linked to saltwater intrusion. Drought affects salt intrusion. The link is missing. Drought affects rice quality directly. The link is missing. Doesn't the flow diagram need an 'erosion' box similar to Figure 3? Natural hazards such as typhoons and anthropogenic impacts (e.g. sediment starvation mentioned in

the paper) will have consequences for both coastal erosion and river channel erosion. This needs further clarity.

We have taken the Reviewer's suggestion into consideration and reworked Figure 2. We separate anthropogenic and natural hazard drivers to reduce clutter. As such, typhoons and droughts were removed. In addition, we have added urban expansion, aquaculture expansion, fruit and vegetable production and agricultural intensification as these drivers would have a major impact on rice production. Lastly, we colour code each driver to represent whether the driver operates at a local or regional scale. A revamped Figure 2 is shown below.

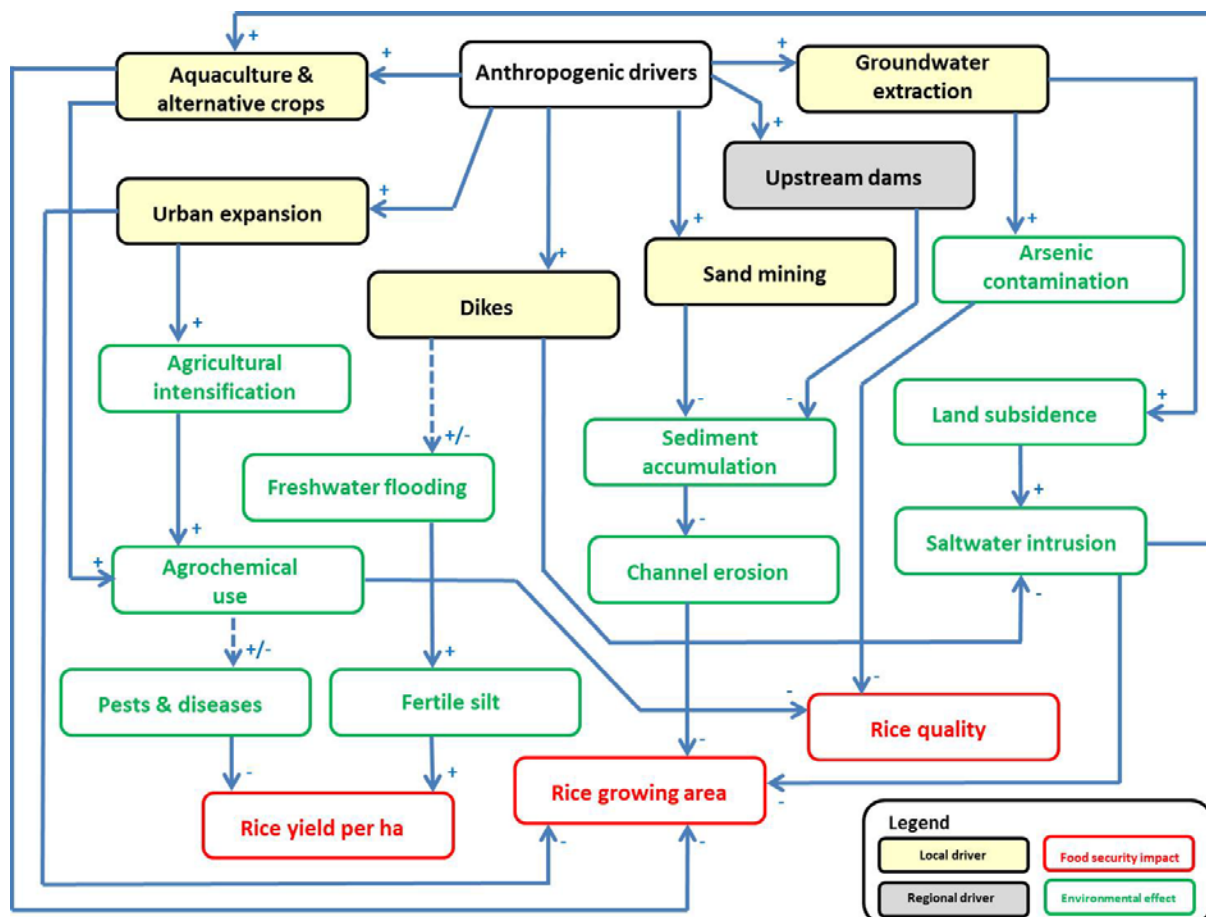

Figure 3. Again, as with Fig.2, this is not strictly speaking a causal loop diagram, because 'rice yield' and 'rice growing area' do not loop back to the head of the figure to affect 'climate change'. This is a flow diagram.

Figure 3. To improve clarity, keep the outcomes of rice yield and rice growing area in a separate row at the bottom of the figure.

Figure 3. Several other points:

Typhoon wind speed affects storm surge height. The direct link is missing. Surely pests and disease affect rice yield? The direct link is missing. Does the 'erosion' box refer to coastal erosion (shoreline retreat) or river channel erosion? This needs further consideration.

We have taken the reviewer's suggestions into consideration and edited Figure 3. We have colour coded each driver to represent whether the driver operates at a local or global scale. A revamped Figure 3 is shown below.

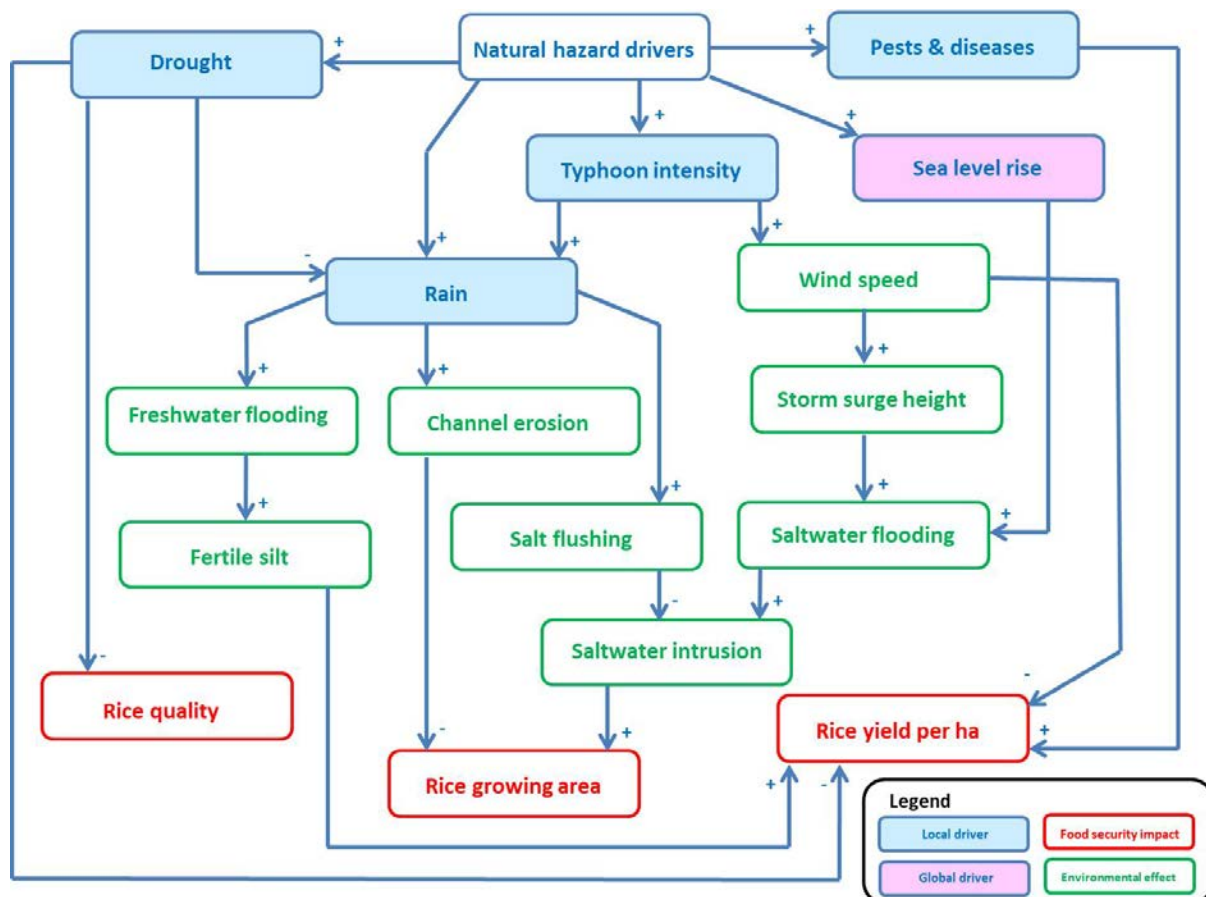

### References used in response to reviewers' comments

- Allison, M. A., Nittrouer, C. A., Ogston, A. S., Mullarney, J. C., and Nguyen, T. T.: Sedimentation and survival of the Mekong Delta. A case study of decreased sediment supply and accelerating rates of relative sea level rise, *Oceanography*, 30, 98-109, <https://doi.org/10.5670/oceanog.2017.318>, 2017.
- Berg, M., Stengel, C., Trang, P. T. K., Hung Viet, P., Sampson, M. L., Leng, M., Samreth, S., and Fredericks, D.: Magnitude of arsenic pollution in the Mekong and Red River Deltas — Cambodia and Vietnam, *Science of The Total Environment*, 372, 413-425, <https://doi.org/10.1016/j.scitotenv.2006.09.010>, 2007.
- Day, J. W., Agboola, J., Chen, Z., D'Elia, C., Forbes, D. L., Giosan, L., Kemp, P., Kuenzer, C., Lane, R. R., Ramachandran, R., Syvitski, J., and Yañez-Arancibia, A.: Approaches to defining deltaic sustainability in the 21st century, *Estuarine, Coastal and Shelf Science*, 183, 275-291, <https://doi.org/10.1016/j.ecss.2016.06.018>, 2016.
- DeFries, R., and Nagendra, H.: Ecosystem management as a wicked problem, *Science*, 356, 265, [10.1126/science.aal1950](https://doi.org/10.1126/science.aal1950), 2017.
- Erban, L. E., Gorelick, S. M., Zebker, H. A., and Fendorf, S.: Release of arsenic to deep groundwater in the Mekong Delta, Vietnam, linked to pumping-induced land subsidence, *Proceedings of the National Academy of Sciences*, 110, 13751-13756, [10.1073/pnas.1300503110](https://doi.org/10.1073/pnas.1300503110), 2013.

Erban, L. E., Gorelick, S. M., and Zebker, H. A.: Groundwater extraction, land subsidence, and sea-level rise in the Mekong Delta, Vietnam, *Environmental Research Letters*, 9, 084010, 10.1088/1748-9326/9/8/084010, 2014.

Fendorf, S., Michael, H. A., and van Geen, A.: Spatial and temporal variations of groundwater arsenic in South and Southeast Asia, *Science*, 328, 1123-1127, 10.1126/science.1172974, 2010.

General Statistics Office of Vietnam: Agriculture, forestry and fishery: <https://www.gso.gov.vn/en/agriculture-forestry-and-fishery/>, access: 19 Nov 2020, 2020.

Grosjean, G., Monteils, F., Hamilton, S. D., Blaustein-Rejto, D., Gatto, M., Talsma, T., Bourgoin, C., Sebastian, L.S., Catacutan, D., Mulia, R., Bui, Y., Tran, D. N., Nguyen, K. G., Pham, M. T., Lan, L. N., and Läderach, P.: Increasing resilience to droughts in Vietnam; The role of forests, agroforests and climate smart agriculture. CCAFS-CIAT-UN-REDD Position Paper n.1, Hanoi, 2016.

Hens, L., Thinh, N. A., Hanh, T. H., Cuong, N. S., Lan, T. D., Thanh, N. V., and Le, D. T.: Sea-level rise and resilience in Vietnam and the Asia-Pacific: A synthesis, *VIETNAM JOURNAL OF EARTH SCIENCES*, 40, 27, 10.15625/0866-7187/40/2/11107, 2018.

Imamura, F., and Dang, V. T.: Flood and Typhoon disasters in Viet Nam in the half century since 1950, *Natural Hazards*, 15, 71-87, 10.1023/a:1007923910887, 1997.

Jordan, C., Tiede, J., Lojek, O., Visscher, J., Apel, H., Nguyen, H. Q., Quang, C. N. X., and Schlurmann, T.: Sand mining in the Mekong Delta revisited - current scales of local sediment deficits, *Scientific Reports*, 9, 17823, 10.1038/s41598-019-53804-z, 2019.

Kondolf, G. M.: Hungry water: Effects of dams and gravel mining on river channels, *Environmental Management*, 21, 533-551, 10.1007/s002679900048, 1997.

Kondolf, G. M., Schmitt, R. J. P., Carling, P., Darby, S., Arias, M., Bizzi, S., Castelletti, A., Cochrane, T. A., Gibson, S., Kummu, M., Oeurng, C., Rubin, Z., and Wild, T.: Changing sediment budget of the Mekong: Cumulative threats and management strategies for a large river basin, *Science of The Total Environment*, 625, 114-134, <https://doi.org/10.1016/j.scitotenv.2017.11.361>, 2018.

Larson, M., Hung, N. M., Hanson, H., Sundström, A., and Södervall, E.: 2 - Impacts of typhoons on the Vietnamese coastline: A case study of Hai Hau Beach and Ly Hoa Beach, in: *Coastal disasters and climate change in Vietnam*, edited by: Thao, N. D., Takagi, H., and Esteban, M., Elsevier, Oxford, 17-42, 2014.

Luu, T. L.: Remarks on the current quality of groundwater in Vietnam, *Environmental Science and Pollution Research*, 26, 1163-1169, 10.1007/s11356-017-9631-z, 2019.

Minderhoud, P. S. J., Erkens, G., Pham, V. H., Bui, V. T., Erban, L., Kooi, H., and Stouthamer, E.: Impacts of 25 years of groundwater extraction on subsidence in the Mekong delta, Vietnam, *Environmental Research Letters*, 12, 064006, 10.1088/1748-9326/aa7146, 2017.

Minderhoud, P. S. J., Coumou, L., Erban, L. E., Middelkoop, H., Stouthamer, E., and Addink, E. A.: The relation between land use and subsidence in the Vietnamese Mekong delta, *Science of The Total Environment*, 634, 715-726, <https://doi.org/10.1016/j.scitotenv.2018.03.372>, 2018.

Nguyen, H. N. V., Kien Trung, and Nguyen, X. N.: Flooding the the Mekong River Delta, Viet Nam. Human development report 2007/2008. Fighting climate change: Human solidarity in a divided world. Human Development Report Office Occassional Paper, 2007.

Normile, D.: Vietnam turns back a 'tsunami of pesticides', *Science*, 341, 737-738, 10.1126/science.341.6147.737, 2013.

Overland, M. A.: Vietnam feels the heat of a 100 year drought: <http://content.time.com/time/world/article/0,8599,1969630,00.html>, access: 20 Nov 2018, 2010.

Park, E., Ho, H. L., Tran, D. D., Yang, X., Alcantara, E., Merino, E., and Son, V. H.: Dramatic decrease of flood frequency in the Mekong Delta due to river-bed mining and dyke construction, *Science of The Total Environment*, 723, 138066, <https://doi.org/10.1016/j.scitotenv.2020.138066>, 2020.

Pham, V., Febriamansyah, R., and Thong, T. A.: Government intervention and farmers' adaptation to saline intrusion: A case study in the Vietnamese Mekong Delta, *International Journal on Advanced Science, Enginerring and Informaiton Technology*, 8, 2142-2148, <http://dx.doi.org/10.18517/ijaseit.8.5.7090>, 2018.

Preston, N., Brennan, D., and Clayton, H.: An overview of the project research, in: *Rice-shrimp farming in the Mekong Delta: Biophysical and Socioeconomic issues*, edited by: Preston, N., and Clayton, H., Australian Centre for International Agricultural Research, Canberra, 7-14, 2003.  
Rittel, H. W. J., and Webber, M. M.: Dilemmas in a general theory of planning, *Policy Sciences*, 4, 155-169, 10.1007/BF01405730, 1973.

Robert, A.: A river in peril: Human activities and environmental impacts on the Lower Mekong River and its Delta, *Environment: Science and Policy for Sustainable Development*, 59, 30-40, 10.1080/00139157.2017.1374794, 2017.

Schmitt, R. J. P., Rubin, Z., and Kondolf, G. M.: Losing ground - scenarios of land loss as consequence of shifting sediment budgets in the Mekong Delta, *Geomorphology*, 294, 58-69, <https://doi.org/10.1016/j.geomorph.2017.04.029>, 2017.

Schneider, P., and Asch, F.: Rice production and food security in Asian Mega deltas—A review on characteristics, vulnerabilities and agricultural adaptation options to cope with climate change, *Journal of Agronomy and Crop Science*, 206, 491-503, <https://doi.org/10.1111/jac.12415>, 2020.

Seto, K. C.: Exploring the dynamics of migration to mega-delta cities in Asia and Africa: Contemporary drivers and future scenarios, *Global Environmental Change*, 21, S94-S107, <https://doi.org/10.1016/j.gloenvcha.2011.08.005>, 2011.

Terry, J. P., Winspear, N., and Cuong, T. Q.: The 'terrific Tongking typhoon' of October 1881 – implications for the Red River Delta (northern Vietnam) in modern times, *Weather*, 67, 72-75, <https://doi.org/10.1002/wea.882>, 2012.

Tessler, Z. D., Vörösmarty, C. J., Grossberg, M., Gladkova, I., Aizenman, H., Syvitski, J. P. M., and Fofoula-Georgiou, E.: Profiling risk and sustainability in coastal deltas of the world, *Science*, 349, 638, 10.1126/science.aab3574, 2015.

UNW-DPC: Drought situation and management in Vietnam:

<http://www.droughtmanagement.info/literature/UNW->

[DPC\\_NDMP\\_Country\\_Report\\_Vietnam\\_2014.pdf](http://www.droughtmanagement.info/literature/UNW-DPC_NDMP_Country_Report_Vietnam_2014.pdf), access: 20 Nov 2018, 2014.
